# Supplementary material for: Volcanic risk ranking and regional mapping of the Central Volcanic Zone of the Andes
Source: Copernicus journal article supplement (doi:10.5194/nhess-24-4267-2024), 2024-11-29
Supplement: Supplementary file 1 [file nhess-24-4267-2024-supplement.zip]

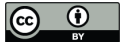

*Supplement of*

**Volcanic risk ranking and regional mapping  
of the Central Volcanic Zone of the Andes**

**María-Paz Reyes-Hardy et al.**

*Correspondence to:* María-Paz Reyes-Hardy ([maria-paz.reyeshardy@unige.ch](mailto:maria-paz.reyeshardy@unige.ch))

- [nhess-24-4267-2024-supplement-title-page.pdf](#)
- [Supplementary Material 1\\_V16.07.2024.xlsx](#)
- [Supplementary Material 2\\_V16.07.2024.xlsx](#)
- [Supplementary Material 3\\_V16.07.2024.docx](#)
- [Supplementary Material 4\\_V16.07.2024.xlsx](#)

The copyright of individual parts of the supplement might differ from the article licence.
