# Supplementary material for: Volcanic risk ranking and regional mapping of the Central Volcanic Zone of the Andes
Source: Copernicus journal article supplement (doi:10.5194/nhess-24-4267-2024), 2024-11-29
Supplement: Supplementary file 1 [file nhess-24-4267-2024-supplement.zip]

## Sheet: CVZA-59
N°	Volcano name	Volcano number GVP	Country	Region/Province	Latitude	Longitude	X	Y	UTM Zone	Elevation	Dominant Rock Type	Estimated volume (km3)	Basal area (km2)	Last known Eruption	Activity evidence	Age	Type (this work)	Max VEI	N° of Holocene eruptions	Holocene pyroclastic flows	Holocene lava flows	Holocene lahars	Holocene tsunamis	Holocene phreatic explosive activity and/or thermal features	Characteristic volcanic products	Sector collapse potential	Lahars potential	Seismic unrest records	Ground deformation records	Fumarolic/magmatic degassing	Chilean Ranking	Argentine Ranking	Peruvian ranking	Disaster Risk management authorities	Volcanic hazard map	Potential impact/ risk assessment?	Engineering Mitigation measures?	Hazard-based land use planning?	Monitoring system?	Early warning system?	Insurance coverage?	Educational activities (for population)?	Exercises/ simulations for operational Institutions?	Exercises/ simulations for population?	Evacuation Plan Plan	Past eruption ...successful evacuation?	Shelters avaiable?
1	Quimsachata	354000	Perú	Cusco	14.133°S	71.367°W	244469	8.43628e+06	19S	3848	Rhyolite (GVP)	32.59	ND	4450 BCE (GVP)	Eruption Dated (GVP)	Holocene (GVP)	Dome complex	ND	1	No	No	No	No	No	Lava flows	No	No	No	No	No	No	No	12	SINAGERD, INDECI, CENEPRED	No	No	No	No	No	No	No	No	No	No	No	No	No
2	Cerro Auquihuato	354001	Perú	Ayacucho	15.070°S	73.180°W	695628	8.33312e+06	18S	4980	Andesite (Martínez and Cervantes, 2003)	5.1	ND	Unknown (GVP)	Evidence Uncertain (GVP)	Holocene (GVP) Pleistocene - Holocene (Macedo et al., 2016)	Pyroclastic cone	ND	ND	No	Yes	No	No	No	Lava flows	No	No	No	Yes	No	No	No	16	SINAGERD, INDECI, CENEPRED	No	No	No	No	Yes	Yes	No	No	No	No	No	No	No
3	Sara Sara	354002	Perú	Ayacucho	15.33°S	73.45°W	666963	8.30464e+06	18S	5522	Andesite / Basaltic Andesite (GVP)	20-25	21.7-47	Unknown (GVP) - 14000 BCE (IGP)	Evidence Credible (GVP)	Holocene (GVP) Pleistocene (Rivera et al., 2020)	Stratovolcano	ND	0	No	No	No	No	Yes	Tephra fallout, PDCs, lahars, debris avalanches and lava flows	Yes	Yes	No	No	No	No	No	10	SINAGERD, INDECI, CENEPRED	Yes	No	No	No	Yes	Yes	No	No	No	No	No	No	No
4	Andahua-Orcopampa	354004	Perú	Arequipa	15.42°S	72.33°W	786567	8.29344e+06	18S	4713	Trachyandesite / Basaltic Trachyandesite (GVP)	15	240	1490 CE (GVP)	Eruption Dated (GVP)	Holocene (GVP)	Volcanic field	ND	4 (3)	No	Yes	No	No	No	Tephra fallout and lava flows	No	No	No	No	Yes	No	No	14	SINAGERD, INDECI, CENEPRED	No	No	No	No	No	No	No	No	No	No	No	No	No
5	Coropuna	354003	Perú	Arequipa	15.52°S	72.65°W	750889	8.27993e+06	18S	6377	Andesite / Basaltic Andesite (GVP)	270	224-350	Unknown (GVP) - ~700 BP (IGP)	Evidence Credible (GVP)	Holocene (GVP) Neogene (IGP)	Stratovolcano	ND	ND	Yes	Yes	Yes	No	Yes	Lava flows, lahars, ballistics, pyroclastic flows, ash and pumice flows, side explosions, domes destruction and shock waves	Yes	Yes	No	No	Yes	No	No	1	SINAGERD, INDECI, CENEPRED	Yes	No	No	No	Yes	Yes	No	No	No	No	No	No	No
6	Huambo	354005	Perú	Arequipa	15.78°S	72.08°W	812871	8.25323e+06	18S	4554	Trachyandesite / Basaltic Trachyandesite (GVP)	ND	ND	700 BCE (GVP)	Eruption Dated (GVP)	Holocene (GVP)	Volcanic field	ND	1 (1)	No	No	No	No	No	Tephra fallout and lava flows	No	No	No	No	No	No	No	15	SINAGERD, INDECI, CENEPRED	No	No	No	No	No	No	No	No	No	No	No	No	No
7	Sabancaya	354006	Perú	Arequipa	15.787°S	71.857°W	193895	8.25255e+06	19S	5960	Andesite / Basaltic Andesite (GVP)	6-10	43.5-70	2021 CE (GVP) 2016 - actualidad (IGP)	Eruption Observed (GVP)	Holocene (GVP)	Stratovolcano	3	14 (12)	Yes	Yes	Yes	No	Yes	Tephra fallout, lava flows, PDCs, ballistics	No	Yes	Yes	Yes	Yes	No	No	2	SINAGERD, INDECI, CENEPRED	Yes	No	No	No	Yes	Yes	No	Yes	No	No	Yes	Yes	No
8	Chachani	354007	Perú	Arequipa	16.191°S	71.53°W	229495	8.20827e+06	19S	6057	Andesite / Basaltic Andesite (GVP)	156-190	313-360	Unknown (GVP) - 56 000 y.a. (IGP)	Evidence Uncertain (GVP)	Holocene (GVP) Pleistocene (Aguilar et al., 2022)	Volcanic complex	ND	0	No	Yes	Yes	No	No	lava flows, tephra fallout, lahars, PDCs	Yes	Yes	Yes	No	Yes	No	No	6	SINAGERD, INDECI, CENEPRED	No	No	No	No	Yes	Yes	No	No	No	No	No	No	No
9	El Misti	354010	Perú	Arequipa	16.294°S	71.409°W	242573	8.19702e+06	19S	5822	Andesite / Basaltic Andesite (GVP)	70-83	89.4	1985 CE (GVP) 1440 - 1470 CE (IGP)	Eruption Observed (GVP)	Holocene (GVP)	Stratovolcano	4 (GVP) 5 (Harpel et. al. 2011)	22 (15)	Yes	No	Yes	No	Yes	Ash and pumice fallout, pyroclastic flow, lahar, and debris avalanche	Yes	No	Yes	No	Yes	No	No	3	SINAGERD, INDECI, CENEPRED	Yes	No	Yes	Yes	Yes	Yes	No	Yes	Yes	Yes	Yes	No	Yes
10	Ubinas	354020	Perú	Moquegua	16.355°S	70.903°W	296727	8.19085e+06	19S	5672	Andesite / Basaltic Andesite (GVP)	22.6-56	58.8-65	2019 CE (GVP)	Eruption Observed (GVP)	Holocene (GVP)	Stratovolcano	5	26 (23)	Yes	No	Yes	No	Yes	Tephra fallout, pyroclastic flows, south flank collapse and emplacement of debris avalanche flows and lahar flows	Yes	Yes	Yes	Yes	Yes	No	No	4	SINAGERD, INDECI, CENEPRED	Yes	No	No	No	Yes	Yes	No	Yes	No	No	Yes	Yes	Yes
11	Huaynaputina	354030	Perú	Moquegua	16.608°S	70.85°W	302646	8.1629e+06	19S	4850	Dacite (GVP)	ND	ND	1600 CE (GVP)	Eruption Observed (GVP)	Holocene (GVP)	Stratovolcano	6	2 (2)	Yes	No	Yes	No	Yes	Tephra fallout, PDCs, lava flows and lahar flows	Yes	Yes	No	No	Yes	No	No	8	SINAGERD, INDECI, CENEPRED	No	No	No	No	Yes	No	No	No	No	No	No	No	No
12	Ticsani	354031	Perú	Moquegua	16.755°S	70.595°W	329986	8.14687e+06	19S	5408	Dacite (GVP)	Debris avalanche deposits ~ 12 km3 (Mariño and Thouret, 2003)	1-cm isopach pumice fall deposits 806 km2 (Mariño and Thouret, 2003	1800 CE (GVP)	Eruption Dated (GVP)	Holocene (GVP)	Stratovolcano	2-3 (Cruz, 2020)	1 (1)	Yes	No	No	No	Yes	Tephra fallout, lahars, and eventually PDCs and lava flows.	Yes	Yes	Yes	Yes	Yes	No	No	9	SINAGERD, INDECI, CENEPRED	Yes	No	No	No	Yes	No	No	No	No	No	No	No	No
13	Tutupaca	354040	Perú	Tacna	17.026°S	70.372°W	353968	8.11706e+06	19S	5801	Andesite / Basaltic Andesite (GVP)	13-13.2	60.5	1802 CE (GVP)	Eruption Observed (GVP)	Holocene (GVP)	Stratovolcano	4	5 (2)	Yes	No	No	No	Yes	Lava flows, pyroclastic flows, tephra fallout, debris avalanche and lahars	Yes	Yes	No	No	Yes	No	No	7	SINAGERD, INDECI, CENEPRED	Yes	No	No	No	Yes	No	No	No	No	No	No	No	No
14	Yucamane	354050	Perú	Tacna	17.184°S	70.196°W	372811	8.0997e+06	19S	5495	Andesite / Basaltic Andesite (GVP)	21-26	45-76.8	1787 CE (INGEMMET) 1320 BCE (GVP)	Eruption Observed (GVP)	Holocene (GVP)	Stratovolcano	5	1 (1)	Yes	Yes	Yes	No	Yes	Tephra fallout, pyroclastic flows, lahars, debris avalanche and lava flows.	Yes	Yes	No	No	Yes	No	No	5	SINAGERD, INDECI, CENEPRED	Yes	No	No	No	Yes	No	No	No	No	No	No	No	No
15	Purupuruni	354804	Perú	Tacna	17.32°S	69.9°W	404362	8.08482e+06	19S	5315	Dacite (Vargas et al., 2012)	ND	20	Pleistocene (GVP)	Pleistocene (GVP)	Pleistocene (GVP) Holocene (Bromley et al., 2019)	Dome complex	ND	ND	No	No	No	No	No	Lava flow/domes, PDCs	No	No	No	No	No	No	No	13	SINAGERD, INDECI, CENEPRED	No	No	No	No	No	No	No	No	No	No	No	No	No
16	Casiri	354060	Perú	Tacna	17.47°S	69.813°W	413678	8.06827e+06	19S	5650	Trachyte / Trachydacite (GVP)	2.9-7	19.6	Unknown (GVP) - 2600 ± 400 BP (IGP)	Evidence Credible (GVP)	Holocene (GVP)	Stratovolcano	ND	ND	Yes	No	No	No	No	Pyroclastic flows, extrusion of domes, and lava flows	Yes	No	No	No	Yes	No	No	11	SINAGERD, INDECI, CENEPRED	No	No	No	No	Yes	Yes	No	No	No	No	No	No	No
17	Tacora	355010	Chile	Arica y Parinacota	17.72°S	69.77°W	418356	8.04063e+06	19S	5980	Andesite / Basaltic Andesite (GVP)	9.4-27	30.8	Unknown (GVP)	Unrest / Holocene (GVP)	Holocene (GVP)	Stratovolcano	ND	2 (0)	No	No	No	No	Yes	Minor tephra fallout, pyroclastic flows, extrusion of domes, volcanic avalanches, lahars and extrusion of blocky lavas.	Yes	No	Yes	No	Yes	60	No	No	SENAPRED	Yes	No	No	No	No	Yes	No	No	No	No	Yes	No	No
18	Taapaca	355011	Chile	Arica y Parinacota	18.1°S	69.5°W	447098	7.99868e+06	19S	5861	Dacite (GVP)	25.9-38	90-250	320 BCE (GVP)	Eruption Dated (GVP)	Holocene (GVP)	Volcanic complex	ND	8 (8)	Yes	Yes	Yes	No	No	Pyroclastic density currents	Yes	No	No	Yes	Yes	42	No	No	SENAPRED	Yes	No	No	No	Yes	Yes	No	No	No	No	Yes	No	No
19	Parinacota	355012	Chile/ Bolivia	Arica y Parinacota/ Oruro	18.166°S	69.142°W	484982	7.99144e+06	19S	6348	Andesite / Basaltic Andesite (GVP)	11.1-56	31.2-180	290 CE (GVP) 1803 CE (Bertin et al., 2022)	Eruption Dated (GVP)	Holocene (GVP)	Stratovolcano	0 (GVP) 4 (Clavero et al., 2004)	38 (6)	Yes	Yes	Yes	Yes	No	Lahars, volcanic avalanches, PDCs, tephra dispersion	Yes	Yes	Yes	No	No	17	No	No	SENAPRED	Yes	No	No	No	Yes	Yes	No	No	No	No	Yes	No	No
20	Guallatiri	355020	Chile	Arica y Parinacota	18.42°S	69.092°W	490284	7.96334e+06	19S	6071	Andesite / Basaltic Andesite (GVP)	7.8-86	27.1-292	1960 CE (GVP)	Eruption Observed (GVP)	Holocene (GVP)	Stratovolcano	2	6 (4)	Yes	Yes	No	No	Yes	Tephra fallout, lahars, lava flows, balistics, PDCs.	Yes	Yes	Yes	No	Yes	25	No	No	SENAPRED	Yes	No	No	No	Yes	Yes	No	No	No	No	Yes	No	Yes
21	Tata Sabaya	355032	Bolivia	Oruro	19.13°S	68.53°W	549429	7.88472e+06	19S	5430	Andesite / Basaltic Andesite (GVP)	9.9	37.4	Unknown (GVP)	Evidence Credible (GVP)	Holocene (GVP)	Stratovolcano	ND	ND	Yes	Yes	No	No	No	Lava domes and flows, pyroclastic flow and debris avalanche	Yes	No	No	No	No	No	No	No	SENAPRED	No	No	No	No	No	No	No	No	No	No	No	No	No
22	Isluga	355030	Chile	Tarapacá	19.15°S	68.83°W	517876	7.88257e+06	19S	5501	Andesite / Basaltic Andesite (GVP)	15.1-113	62.7-214	1913 CE (GVP)	Eruption Observed (GVP)	Holocene (GVP)	Stratovolcano	2	8 (7)	Yes	Yes	No	No	Yes	Lava flows, PDCs, tephra fallout.	Yes	No	Yes	No	Yes	41	No	No	SENAPRED	Yes	No	No	No	Yes	Yes	No	No	No	No	Yes	No	Yes
23	Irruputuncu	355040	Chile/ Bolivia	Tarapacá/ Potosí	20.73°S	68.55°W	546852	7.70767e+06	19S	5165	Andesite / Basaltic Andesite (GVP)	3.4-12	14.2-44	1995 CE (GVP)	Eruption Observed (GVP)	Holocene (GVP)	Stratovolcano	2	2 (1)	Yes	No	No	No	Yes	Lava domes, PDCs, tephra fallout	Yes	No	Yes	No	Yes	45	No	No	SENAPRED	Yes	No	No	No	Yes	Yes	No	No	No	No	Yes	No	Yes
24	Olca-Paruma	355050	Chile/ Bolivia	Tarapacá-Antofagasta/ Potosí	20.939°S	68.413°W	561032	7.68449e+06	19S	5450	Andesite / Basaltic Andesite (GVP)	19.8-74	79.6-2227	Unknown (GVP)	Eruption Observed (GVP)	Holocene (GVP)	Volcanic complex	ND	1 (0)	No	Yes	No	No	No	Lava flows	Yes	No	No	No	Yes	61	No	No	SENAPRED	Yes	No	No	No	Yes	Yes	No	No	No	No	Yes	No	No
25	Aucanquilcha	355823	Chile	Antofagasta	21.22°S	68.47°W	555002	7.65341e+06	19S	6176	Andesite (de Silva and Francis, 1991)	24.4-327±20	64.9-700	Pleistocene (GVP)	Pleistocene (GVP)	Pleistocene (GVP)	Stratovolcano	ND	0	No	No	No	No	No	Volcanic avalanches, lava flows, tephra fallout	Yes	No	No	No	Yes	71	No	No	SENAPRED	Yes	No	No	No	No	No	No	Yes	Yes	Yes	No	No	Yes
26	Ollagüe	355060	Chile/ Bolivia	Antofagasta/ Potosí	21.3°S	68.18°W	585052	7.64443e+06	19S	5863	Andesite / Basaltic Andesite (de Silva and Francis, 1991)	43-181	113-260	Pleistocene (GVP)	Pleistocene (GVP)	Pleistocene (GVP)	Stratovolcano	ND	0	No	No	No	No	Yes	PDCs, volcanic avalanches, tephra fallout	Yes	No	Yes	No	Yes	66	No	No	SENAPRED	Yes	No	No	No	Yes	Yes	No	Yes	Yes	Yes	Yes	No	Yes
27	Cerro del Azufre (Apacheta-Aguilucho)	355061	Chile	Antofagasta	21.787°S	68.237°W	578876	7.59055e+06	19S	5846	Andesite / Basaltic Andesite (GVP)	33.4	96.5	Unknown (GVP)	Evidence Uncertain (GVP)	Holocene (GVP)	Volcanic complex	ND	ND	No	No	No	No	Yes	PDCs, volcanic avalanches, tephra fallout	Yes	No	No	Yes	Yes	77	No	No	SENAPRED	Yes	No	No	No	No	No	No	No	No	No	No	No	No
28	San Pedro	355070	Chile	Antofagasta	21.888°S	68.391°W	562912	7.57945e+06	19S	6145	Andesite / Basaltic Andesite (GVP)	40-56	124-150	1960 CE (GVP)	Eruption Observed (GVP)	Holocene (GVP)	Stratovolcano	2	10 (6)	Yes	Yes	No	No	Yes	Tephra fallout, PDCs, lava flows, and lahars	Yes	No	No	No	Yes	36	No	No	SENAPRED	Yes	No	No	No	Yes	Yes	No	No	No	No	Yes	No	No
29	Uturuncu	355838	Bolivia	Potosí	22.27°S	67.18°W	687527	7.53616e+06	19S	6008	Andesite/ Dacite (GVP)	54	174	Pleistocene	Pleistocene	Pleistocene (GVP)	Stratovolcano	ND	0	No	No	No	No	No	Pyroclastic flows, lava flows, ballistic projectiles, gases and tephrafallout	No	No	Yes	Yes	Yes	No	No	No	No	Yes	No	No	No	No	No	No	No	No	No	No	No	No
30	Putana	355090	Chile/ Bolivia	Antofagasta/ Potosí	22.557°S	67.853°W	617932	7.50507e+06	19S	5890	Dacite (GVP)	17.3	57.5-600	1810 CE (GVP)	Eruption Observed (GVP)	Holocene (GVP)	Stratovolcano	2	2 (1)	No	Yes	No	No	Yes	Viscous lava flows and pyroclastic material	No	No	Yes	Yes	Yes	69	No	No	SENAPRED	Yes	No	No	No	No	No	No	No	No	No	Yes	No	No
31	Escalante-Sairecabur	355091	Chile/ Bolivia	Antofagasta/ Potosí	22.72°S	67.892°W	613787	7.48705e+06	19S	5971	Andesite / Basaltic Andesite (GVP)	79	216	Unknown (GVP)	Evidence Credible (GVP)	Holocene (GVP)	Volcanic complex	ND	ND	No	Yes	No	No	Yes	Lava flows	No	No	No	No	No	72	No	No	SENAPRED	Yes	No	No	No	No	Yes	No	No	No	No	Yes	No	No
32	Licancabur	355092	Chile/ Bolivia	Antofagasta/ Potosí	22.83°S	67.88°W	614928	7.47486e+06	19S	5916	Andesite / Basaltic Andesite (GVP)	10.3-39	28.5	Unknown (GVP)	Evidence Credible (GVP)	Holocene (GVP)	Stratovolcano	ND	ND	No	Yes	No	No	No	Lava flows, PDCs	No	No	No	No	No	68	No	No	SENAPRED	Yes	No	No	No	No	Yes	No	No	No	No	Yes	No	No
33	Acamarachi (Pili)	355096	Chile	Antofagasta	23.292°S	67.618°W	641332	7.42348e+06	19S	6046	Dacite (GVP)	4.6	18	Unknown (GVP)	Evidence Credible (GVP)	Pleistocene-Holocene (Otros) Holocene (GVP)	Stratovolcano	ND	ND	No	No	No	No	No	Lava flows, lava dome	No	No	No	No	No	81	No	No	SENAPRED	Yes	No	No	No	No	Yes	No	No	No	No	Yes	No	No
34	Lascar	355100	Chile	Antofagasta	23.37°S	67.73°W	629801	7.41495e+06	19S	5592	Andesite / Basaltic Andesite (GVP)	9.8-81	33.8-62.2	2017 CE (GVP, 2021) 2023 CE (GVP, 2023)	Eruption Observed (GVP)	Holocene (GVP)	Stratovolcano	4	37 (32)	Yes	Yes	Yes	No	Yes	Tephra fallout, PDCs, ballistic projectiles, debris avalanches	Yes	No	Yes	Yes	Yes	14	No	No	SENAPRED	Yes	No	No	No	Yes	Yes	No	No	Yes	Yes	Yes	No	Yes
35	Chiliques	355098	Chile	Antofagasta	23.58°S	67.7°W	632658	7.39167e+06	19S	5778	Andesite / Basaltic Andesite (GVP)	4.8	18.9	Unknown (GVP)	Evidence Uncertain (GVP)	Pleistocene-Holocene (Otros) Holocene (GVP)	Volcanic complex	ND	ND	No	Yes	No	No	Yes	Lava flows	No	No	No	No	Yes	75	No	No	SENAPRED	Yes	No	No	No	No	No	No	No	No	No	No	No	No
36	Alitar	ND	Chile	Antofagasta	23.8°S	67.39°W	637696	7.43946e+06	19S	5346	Andesite/ Dacite (Amigo et al., 2012)	ND	ND	Pleistocene	Pleistocene	Pleistocene (Amigo et al., 2012)	Maar	ND	0	No	No	No	No	Yes	Tephra fallout and ballistic projectiles.	No	No	No	No	Yes	86	No	No	SENAPRED	Yes	No	No	No	No	Yes	No	No	No	No	Yes	No	No
37	Puntas Negras	ND	Chile	Antofagasta	23.44°S	67.32°W	649527	7.37456e+06	19S	5852	Andesite/ Dacite (de Silva and Francis, 1991)	ND	ND	ND	ND	Holocene (de Silva & Francis, 1991)	Volcanic complex	ND	ND	No	No	No	No	No	Lava flows and hot avalanches	No	No	No	No	No	80	No	No	SENAPRED	No	No	No	No	No	No	No	No	No	No	No	No	No
38	Tuzgle	355150	Argentina	Jujuy	24.05°S	66.48°W	756268	7.33794e+06	19S	5486	Dacite (GVP)	9.1	32.8	Unknown (GVP)	Evidence Uncertain (GVP)	Holocene (GVP)	Stratovolcano	ND	ND	No	Yes	No	No	Yes	Lava flows, debris avalanches	Yes	No	No	No	No	No	13	No	SINAGIR	No	No	No	No	No	No	No	No	No	No	No	No	No
39	Aracar	355160	Argentina	Salta	24.29°S	67.783°W	623510	7.31313e+06	19S	6095	Andesite / Basaltic Andesite (GVP)	50-61.6	113-192.4	Unknown (GVP)	Evidence Credible (GVP)	Holocene (GVP)	Stratovolcano	2	1 (0)	No	Yes	No	No	No	Lava flows	No	No	No	No	No	No	31	No	SINAGIR	No	No	No	No	No	No	No	No	No	No	No	No	No
40	Socompa	355109	Chile/ Argentina	Antofagasta/ Salta	24.396°S	68.246°W	576455	7.30172e+06	19S	6031	Dacite (GVP)	81-179	158	5250 BCE (GVP)	Eruption Dated (GVP)	Holocene (GVP)	Stratovolcano	ND	1 (1)	Yes	No	No	No	No	Lava flows, debris avalanches	Yes	No	No	Yes	Yes	48	9	No	SENAPRED, SINAGIR	Yes	No	No	No	No	No	No	No	No	No	No	No	No
41	Arizaro volcanic field (Salar de Arizaro)	ND	Argentina	Salta	24.450°S	68.0230°W	599026	7.2956e+06	19S	5.736	Basaltic andesite (Schoenbohm and Carrapa, 2015)	<0.4-59 (Viramonte et al., 1984;Grosse et al., 2017)	6x4 km (Dow and Hitzman, 2002)	80,000 ± 60,000 BP (Schoenbohm and Carrapa, 2015)	ND	Upper Miocene-Holocene (Viramonte et al., 1984)	Volcanic field	ND	ND	No	Yes	No	No	No	Lava flows and tephra fallout	No	No	No	No	No	No	38	No	SINAGIR	No	No	No	No	No	No	No	No	No	No	No	No	No
42	Llullaillaco	355110	Chile/ Argentina	Antofagasta/ Salta	24.72°S	68.53°W	547535	7.26597e+06	19S	6739	Dacite (GVP)	37-144	88.4	1877 CE (GVP)	Eruption Observed (GVP)	Holocene (GVP)	Stratovolcano	2	3 (3)	No	Yes	No	No	No	Lava flows, PDCs	Yes	Yes	No	No	No	83	18	No	SENAPRED, SINAGIR	Yes	No	No	No	No	No	No	No	No	No	No	No	No
43	Escorial (Corrida de Cori Volcanic field)	355112	Chile/ Argentina	Antofagasta/ Salta	25.083°S	68.367°W	563834	7.22571e+06	19S	5451	Andesite / Basaltic Andesite (GVP)	3.7	25.3	Unknown (GVP)	Evidence Uncertain (GVP)	Pleistocene (Otros)-Holocene (GVP)	Stratovolcano	ND	ND	No	No	No	No	No	Lava flows	No	No	No	No	No	No	36	No	SENAPRED, SINAGIR	Yes	No	No	No	No	No	No	No	No	No	No	No	No
44	Lastarria	355120	Chile/ Argentina	Antofagasta/ Salta	25.168°S	68.507°W	549681	7.21636e+06	19S	5706	Andesite / Basaltic Andesite (GVP)	7.8-31	37.5-105	Unknown (GVP)	Evidence Credible (GVP)	Pleistocene (Otros)-Holocene (GVP)	Stratovolcano	ND	ND	Yes	Yes	No	No	Yes	Tephra fallout, PDCs	Yes	No	Yes	Yes	Yes	70	11	No	SENAPRED, SINAGIR	Yes	No	No	No	Yes	Yes	No	No	No	No	Yes	No	No
45	Cordón del Azufre	355121	Chile/ Argentina	Antofagasta/ Salta	25.336°S	68.521°W	548204	7.19776e+06	19S	5481	Andesite / Basaltic Andesite (GVP)	6.3	42.2	Unknown (GVP)	Evidence Credible (GVP)	Holocene (GVP)	Volcanic complex	ND	ND	No	No	No	No	No	Tephra fallout, lava flows	No	No	No	No	No	84	26	No	SENAPRED, SINAGIR	Yes	No	No	No	No	No	No	No	No	No	No	No	No
46	Cerro Bayo	355122	Chile/ Argentina	Antofagasta/ Salta	25.414°S	68.588°W	541435	7.18915e+06	19S	5413	Andesite / Basaltic Andesite (GVP)	33	116	Unknown (GVP)	Evidence Credible (GVP)	Partial Holocene (Otros) Holocene (GVP)	Volcanic complex	ND	ND	No	Yes	No	No	Yes	Lava flows, pyroclastic flows and tephra fallout	No	No	No	Yes	No	85	28	No	SENAPRED, SINAGIR	No	No	No	No	No	No	No	No	No	No	No	No	No
47	Antofagasta de la Sierra (Antofagasta volcanic field)	355180	Argentina	Catamarca	26.12°S	67.4°W	659974	7.11004e+06	19S	3495	Andesite / Basaltic Andesite (GVP)	0.12 (Alumbrera) + 0.12 (La Laguna)	41.3 (Alumbrera) + 6.8 (La Laguna)	Unknown (GVP)	Evidence Uncertain (GVP)	Holocene (GVP)	Volcanic complex	ND	ND	No	Yes	No	No	No	Lava flows, Tephra fallout, PDCs	Yes	No	No	No	No	No	33	No	SINAGIR	No	No	No	No	No	No	No	No	No	No	No	No	No
48	Sierra Nevada	355123	Chile/ Argentina	Atacama/ Catamarca	26.48°S	68.58°W	541861	7.07109e+06	19S	6173	Andesite (de Silva and Francis, 1991)	73-100	198-285	Unknown (GVP)	Evidence Credible (GVP)	Partial Holocene (Otros) Holocene (GVP)	Volcanic complex	ND	ND	No	Yes	No	No	No	Lava flows	No	No	No	No	No	No	34	No	SENAPRED, SINAGIR	No	No	No	No	No	No	No	No	No	No	No	No	No
49	Cueros de Purulla	ND	Argentina	Catamarca	26.552°S	67.820°W	617452	7.06257e+06	19S	4912	Rhyolite (Siebel et al., 2001)	5.19	ND	ND	Evidence Credible (Bertin, 2022)	Upper Pleistocene-possibly Holocene (Bertin, 2022)	Dome complex	ND	0	No	No	No	No	No	Tephra fallout PDC's and lava flows	No	No	No	No	No	No	20	No	SINAGIR	No	No	No	No	No	No	No	No	No	No	No	No	No
50	Peinado	355200	Argentina	Catamarca	26.623°S	68.116°W	587999	7.05502e+06	19S	5741	Andesite / Basaltic Andesite (GVP)	15.3-20	44.3-93	Unknown (GVP)	Evidence Credible (GVP)	Holocene (GVP)	Stratovolcano	ND	ND	Yes	Yes	No	No	No	PDCs, lava flows	No	No	No	No	No	No	30	No	SINAGIR	No	No	No	No	No	No	No	No	No	No	No	No	No
51	Cerro El Cóndor	355190	Argentina	Catamarca	26.632°S	68.361°W	563604	7.05416e+06	19S	6373	Andesite/ Basaltic andesite (de Silva and Francis, 1991)	41-109	128-281	Unknown (GVP)	Evidence Credible (GVP)	Holocene (GVP)	Stratovolcano	ND	ND	No	Yes	No	No	No	Tephra fallout, debris avalanches and lava flows	Yes	No	No	No	No	No	23	No	SINAGIR	No	No	No	No	No	No	No	No	No	No	No	No	No
52	Cerro Blanco	355210	Argentina	Catamarca	26.789°S	67.765°W	622764	7.03634e+06	19S	4670	Rhyolite (GVP)	ND	ND	2300 BCE (GVP)	Eruption Dated (GVP)	Holocene (GVP)	Caldera	7	1 (1)	Yes	Yes	No	No	No	PDCs	No	No	Yes	Yes	Yes	No	5	No	SINAGIR	No	No	No	No	No	No	No	No	No	No	No	No	No
53	Falso Azufre	355124	Chile/ Argentina	Atacama/ Catamarca	26.8°S	68.37°W	562617	7.03556e+06	19S	5906	Andesite/ Dacite (de Silva and Francis, 1991)	83 - 101	310 - 387	Unknown (GVP)	Evidence Uncertain (GVP)	Holocene (GVP)	Volcanic complex	ND	ND	No	Yes	No	No	No	PDCs, tephra fallout and lava flows	No	No	No	No	No	No	27	No	SENAPRED, SINAGIR	No	No	No	No	No	No	No	No	No	No	No	No	No
54	Nevados de Incahuasi	355125	Chile/ Argentina	Atacama/ Catamarca	27.033°S	68.296°W	569828	7.00971e+06	19S	6638	Dacite (GVP)	54 - 231	125 -207	Unknown (GVP)	Evidence Uncertain (GVP)	Holocene (GVP)	Volcanic complex	ND	ND	No	No	No	No	No	Tephra fallout, PDCs, lava flows	No	No	No	No	No	No	35	No	SENAPRED, SINAGIR	No	No	No	No	No	No	No	No	No	No	No	No	No
55	El Fraile	ND	Chile/ Argentina	Atacama/ Catamarca	27.049°S	68.379°W	561516	7.00799e+06	19S	6068	Dacite/ Rhyodacite (Naranjo et al., 2019; Gonzalez-Ferran et al., 1985)	3.5 - 5.3	22	ND	Evidence Credible (Bertin, 2022)	Upper Pleistocene-possibly Holocene (Bertin, 2022)	Dome complex	ND	0	No	No	No	No	No	Tephra fallout and PDC's	No	No	No	No	Yes	No	22	No	SENAPRED, SINAGIR	No	No	No	No	No	No	No	No	No	No	No	No	No
56	Nevado Tres Cruces	355862	Chile/ Argentina	Atacama/ Catamarca	27.08°S	68.8°W	519829	7.00469e+06	19S	6620	Dacite/ Rhyodacite (Amigo et al., 2012)	38-225	126-1000	Pleistocene (GVP)	Pleistocene (GVP)	Pliocene-Pleistocene (GVP)	Stratovolcano	ND	0	No	Yes	No	No	No	Tephra fallout, PDCs	No	No	No	No	No	79	24	No	SENAPRED, SINAGIR	No	No	No	No	No	No	No	No	No	No	No	No	No
57	El Solo	355131	Chile/ Argentina	Atacama/ Catamarca	27.105°S	68.713°W	528448	7.0019e+06	19S	6205	Dacite (GVP)	4.4-11	15.6-19	Unknown (GVP)	Evidence Credible (GVP)	Holocene (GVP)	Stratovolcano	ND	ND	No	No	No	No	No	Tephra fallout, PDCs	No	No	No	No	No	No	37	No	SENAPRED, SINAGIR	No	No	No	No	No	No	No	No	No	No	No	No	No
58	Nevados Ojos del Salado	355130	Chile/ Argentina	Atacama/ Catamarca	27.109°S	68.541°W	545496	7.00141e+06	19S	6879	Dacite (GVP)	40.3 - 54	70-148	750 CE (GVP)	Eruption Dated (GVP)	Holocene (GVP)	Volcanic complex	1	2 (1)	Yes	No	No	No	No	PDCs, tephra fallout and lava flows	No	No	No	No	Yes	82	21	No	SENAPRED, SINAGIR	No	No	No	No	No	No	No	No	No	No	No	No	No
59	Cerro Tipas (Walker Penk)	355220	Argentina	Catamarca	27.196°S	68.561°W	543480	6.99178e+06	19S	6658	Dacite/ Rhiolyte (Kay et al., 2013)	43-52	25-211	Unknown (GVP)	Evidence Credible (GVP)	Holocene (GVP)	Volcanic complex	ND	ND	No	No	No	No	No	PDCs, tephra fallout and lava flows	No	No	No	No	No	No	32	No	SINAGIR	No	No	No	No	No	No	No	No	No	No	No	No	No
*The number in parentheses in the "N° of Holocene eruptions" column corresponds to the number of eruptions confirmed by GVP (2023).
